# Supplementary material
Source: ML conference proceedings conference paper supplement (https://openreview.net/forum?id=mj8VN4MyrO)
Supplement: supplementary_material [file NeurIPS2025_ThinkSound_Appendix.pdf › Supplementary_Materials/NeurIPS2025_ThinkSound_Appendix.pdf]

---

# ThinkSound: Chain-of-Thought Reasoning in Multimodal Large Language Models for Audio Generation and Editing

---

Anonymous Author(s)

Affiliation

Address

email

## A AudioCoT Dataset Details

### A.1 Data Collection and Preprocessing

To ensure high data quality and consistency, we employ a comprehensive preprocessing pipeline. We begin by removing silent audio-video clips to retain only those with meaningful content. For the AudioSet subset (Gemmeke et al., 2017), we further exclude segments containing human voices based on tag information, as our focus is on non-speech audio. All audio-video clips are then segmented into fixed-length intervals of 9.1 seconds, with any shorter clips discarded to maintain uniformity. To achieve a balanced dataset, we maintain an approximately 1:1 ratio between music and sound effect samples, ensuring equal representation of both categories.

### A.2 Quality Control for Automated Data Pipeline

To enhance the effectiveness of CoT reasoning in preserving audio characteristics while integrating visual context, we implemented a comprehensive multi-stage quality control pipeline:

**Stage 1: Audio-Text Alignment Filtering** We employ a systematic approach to ensure high-quality audio-CoT pairs. First, we calculate the CLAP score between each audio sample and its corresponding CoT description to quantify semantic alignment. For pairs exhibiting low CLAP scores (below 0.2), we regenerate the CoT using an enhanced prompt specifically designed to emphasize audio characteristics and features. After regeneration, we recalculate the CLAP score to assess improvement. Audio samples that continue to demonstrate poor alignment (persistent low CLAP scores) are excluded from the dataset to maintain quality standards.

**Stage 2: Object Tracking Consistency** To ensure reliable audio-visual correspondence, we retain only those video sequences containing at least one Region of Interest (ROI) that remains consistently visible throughout the entire duration. Videos with objects that disappear from view or exhibit inconsistent tracking are filtered out. This criterion ensures that our dataset maintains high-quality visual references for audio generation tasks, providing consistent visual anchors for the audio generation process.

**Stage 3: Semantic Pairing of Audio Components** For tasks requiring paired audio components, we utilize GPT-4.1-nano to analyze tag categories from VGGSound (Chen et al., 2020) based on two critical criteria. First, we ensure semantic distinctiveness, where tags must be sufficiently distinct to avoid confusion during audio extraction and removal tasks. Second, we verify contextual plausibility, ensuring that the co-occurrence of paired sounds is contextually reasonable within the same acoustic scene. This balanced approach ensures that our audio pairs are both semantically meaningful and practically useful for audio generation tasks.

**Human Verification Protocol** To validate our automated filtering processes, we implement a rigorous manual review at each pipeline stage. No less than 5% of the total data volume undergoes human inspection to ensure quality. This verification step helps validate the effectiveness of our automated filtering criteria and ensures the overall reliability and quality of our dataset. The human reviewers assess both the technical aspects of alignment and the perceptual quality of the audio-visual correspondence. When samples fail human verification, they are immediately removed from the dataset. Additionally, if the human rejection rate for any filtering criterion exceeds 5%, we recalibrate the corresponding automated filtering parameters and reprocess the entire batch to maintain dataset integrity. This feedback loop between automated filtering and human verification ensures continuous improvement of our quality control pipeline.

Table 1: Overview of datasets used in our work.

| Dataset                            | Modality    | Text Format | Hours         |
|------------------------------------|-------------|-------------|---------------|
| VGGSound (Chen et al., 2020)       | Audio-Video | Caption     | <b>453.6</b>  |
| AudioSet (Gemmeke et al., 2017)    | Audio-Video | Caption     | 287.5         |
| AudioSet-SL (Hershey et al., 2021) | Audio-Text  | Caption     | 262.6         |
| Freesound (Fonseca et al., 2017)   | Audio-Text  | Caption     | <b>1286.6</b> |
| AudioCaps (Kim et al., 2019)       | Audio-Text  | Caption     | 112.6         |
| BBC Sound Effects <sup>1</sup>     | Audio-Text  | Tags        | 128.9         |
| <b>Total Hours</b>                 | –           | –           | <b>2531.8</b> |

### A.3 Benchmark Construction

We evaluate the performance of ThinkSound on three different tasks: video-to-audio generation, object-focused audio generation, and audio editing. For the video-to-audio generation task, we use the VGGSound test set as the in-distribution evaluation set while the MovieGen Audio Bench is the out-of-distribution evaluation set. For the VGGSound test set, we use the same quality filtering protocol as our training data preparation. Given that our primary focus is on video-to-sound/music generation, we construct three different difficulty levels based on the complexity of the audio-visual relationships. Specifically, we distinguish the difficulty levels based on a multi-dimensional scoring system that evaluates:

- **Semantic Consistency:** The alignment between the audio and the visual content evaluated by Imagebind score (0.3+ for easy, 0.25-0.3 for medium, 0.2-0.25 for hard), and CLAP score between audio and CoT (0.4+ for easy, 0.3-0.4 for medium, 0.2-0.3 for hard).
- **Temporal Synchronization:** The degree of synchronization between visual events and corresponding sounds evaluated by DeSync score (0-0.3 for easy, 0.3-0.6 for medium, 0.6+ for hard).
- **Acoustic Scene Complexity:** The audio events' numbers (one dominant sound for easy, 2-3 distinct sounds for medium, multiple overlapping sounds for hard)

According to the above evaluation criteria, we input the scores and criteria into GPT-4.1-nano to generate the difficulty level for each sample. The final difficulty assignment follows a tertile distribution: the lowest-scoring third is classified as "easy," the middle third as "medium," and the highest-scoring third as "hard." This stratified approach ensures balanced representation across difficulty levels while maintaining meaningful distinctions in task complexity. For each difficulty level, we construct a benchmark subset containing around 2000 samples.

For stages 2 and 3, we maintain methodological consistency with our training protocols while adapting the evaluation criteria to each task's specific requirements. For stage 2, we select samples with clearly identifiable visual objects that produce distinct sounds, while for stage 3, we focus on samples with different audio categories suitable for manipulation tasks. Each evaluation subset contains approximately 2,000 samples.

## 71 B Model Configurations and Architecture

### 72 B.1 Model Configurations

73 ThinkSound consists of two primary components: a hierarchical variational autoencoder (VAE) for  
74 audio compression and reconstruction, and a flow-matching multimodal transformers.

75 **Variational Autoencoder** The encoder consists of five convolutional blocks with channel multipli-  
76 ers [1, 2, 4, 8, 16] and strides [2, 4, 4, 8, 8], projecting the stereo waveform into a 128-dimensional  
77 latent space. The decoder mirrors this architecture with transposed convolutions to reconstruct  
78 64-dimensional latent representations back into the time-domain waveform.

79 **Multimodal Diffusion Transformer** ThinkSound employs an enhanced Multi-modal Diffusion  
80 Transformer (MM-DiT) with a hidden size dimension of 1024. It comprises 14 multi-stream trans-  
81 former layers and 7 single-stream transformer layers, with 16 attention heads. We further attach our  
82 different model scale parameters for reference. We use the large model by default.

Table 2: Diffusion Transformer Configurations at Different Model Sizes

| Model Scale | Hidden Size | Depth | Attention Heads | Multistream Layers | Singlestream Layers | Total Parameters |
|-------------|-------------|-------|-----------------|--------------------|---------------------|------------------|
| Large       | 1024        | 21    | 16              | 14                 | 7                   | 1.3B             |
| Medium      | 768         | 21    | 12              | 14                 | 7                   | 724M             |
| Small       | 512         | 18    | 8               | 12                 | 6                   | 533M             |

### 83 B.2 Model Architecture

The architecture of multistream transformers is depicted in Figure 1.

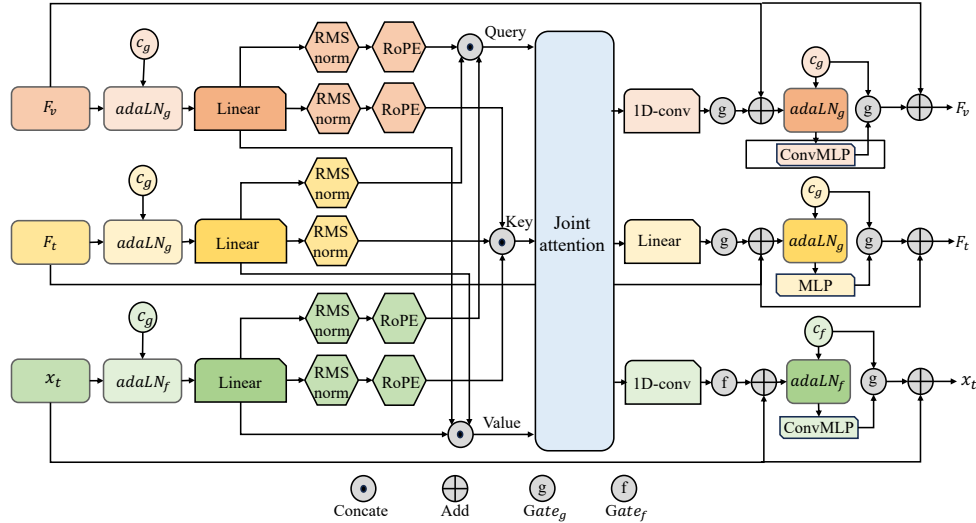

Figure 1: Multi-stream blocks:  $F_v$  is the video features,  $F_t$  is the text features,  $x_t$  is the audio latents, and  $c_g$  denotes the global condition.

## 85 C Evaluation

### 86 C.1 Objective Metrics

87 To comprehensively evaluate the generated audio, we adopt a set of objective metrics targeting  
88 different aspects: perceptual quality, semantic consistency, temporal alignment, and cross-modal  
89 correspondence.

90 **Feature Distribution Alignment:** We project both generated and reference audio into the OpenL3  
91 embedding space Cramer et al. (2019); Evans et al. (2024) and compute the **Fréchet Distance**  
92 **(FD)** Kilgour et al. (2018); Copet et al. (2024) to assess the similarity between their distributional  
93 statistics. We chose OpenL3 because it accepts signals of up to 48kHz while VGGish operates at  
94 16kHz, which is more suitable for our 44kHz audio. Following the previous work Evans et al. (2024),  
95 we extend the FD to evaluate stereo signals by projecting left and right channels separately and then  
96 averaging the results. Moreover, to evaluate whether the generated audio matches the reference in  
97 terms of its distribution, we compute the **Kullback-Leibler (KL) Divergence** Copet et al. (2024)  
98 between class probability distributions predicted by the PaSST model Koutini et al. (2021) and PaNNs  
99 model (Kong et al., 2020) as classifiers.

100 **Temporal Alignment:** To evaluate the synchronization between generated audio and its correspond-  
101 ing video, we adopt the **DeSync** score predicted by the Synchformer model Iashin et al. (2024),  
102 following the practice of Cheng et al. (2024). For each sample, we truncate the video to match the  
103 duration of the generated audio and compute the DeSync score using Synchformer, which operates  
104 with a 4.8-second context window. Specifically, we extract both the first and last 4.8-second segments  
105 from each video-audio pair, calculate the DeSync score for each segment, and report the average as  
106 the final temporal alignment metric. **Text-Audio Correspondence:** To assess the semantic alignment  
107 between generated audio and textual prompts, we utilize the **CLAP score** Wu\* et al. (2023); Chen  
108 et al. (2022), which measures similarity in a shared audio-text embedding space. Specifically, we  
109 report CLAP<sub>cap</sub> for evaluating alignment with the original video captions and CLAP<sub>CoT</sub> for alignment  
110 with our constructed CoT descriptions. As discussed in Section 5.2, the original VGGSound captions  
111 are often low quality and yield lower CLAP scores, whereas our CoT annotations provide richer  
112 semantic detail and achieve higher alignment. **Consequently, we primarily use the CoT-audio**  
113 **alignment metric in our evaluations, except in Table 1 where caption-based alignment is also**  
114 **reported.**

### 115 C.2 Subjective Metrics

116 Our subjective evaluation framework employs the Mean Opinion Score (MOS) methodology along  
117 two critical dimensions to comprehensively assess the generated audio:

118 **Audio Quality Assessment (MOS-Q)** We evaluate the intrinsic perceptual quality of generated  
119 audio through a rigorous assessment protocol where participants are instructed to focus on four  
120 specific aspects:

- 121 • *Clarity*: The absence of unwanted artifacts, distortions, or noise
- 122 • *Naturalness*: How realistic and non-synthetic the audio sounds
- 123 • *Fidelity*: The richness and accuracy of acoustic characteristics
- 124 • *Overall impression*: The holistic listening experience

125 Each listener rates these qualities using a standard 5-point Likert scale (1: Poor, 2: Fair, 3: Good,  
126 4: Very Good, 5: Excellent). The final MOS-Q score for each audio sample represents the average  
127 rating across all evaluators, providing a robust measure of perceived audio quality.

128 **Semantic and Temporal Alignment Assessment (MOS-A)** To evaluate the cross-modal coher-  
129 ence between generated audio and visual content, we assess both semantic relevance and temporal  
130 synchronization (we also provide CoT text as the auxiliary information for semantic alignment):

- 131 • *Semantic alignment*: How well the audio content matches the objects, actions, and environ-  
132 ment depicted in the video

- *Temporal alignment*: How accurately sound events correspond to visual events in time
- Participants judge the alignment according to three categories on the same 5-point scale:
- *Fully aligned* (4-5 points): Complete semantic correspondence with precise temporal synchronization
  - *Mostly aligned* (2.5-3.9 points): Good semantic match with occasional minor temporal misalignments
  - *Partially aligned* (1-2.4 points): Noticeable discrepancies in either semantic content or temporal synchronization

**Evaluation Protocol** To ensure evaluation reliability and consistency, we implemented the following protocol:

- All assessments were conducted in controlled in-person sessions with standardized audio equipment
- 15 raters with normal hearing ability were recruited and briefed on the evaluation criteria
- Each rater evaluated a random subset of 50 video-audio pairs from our test collection
- Samples were presented in randomized order to prevent ordering bias
- Reference examples of each quality level were provided before the evaluation sessions
- Raters were given sufficient time to carefully evaluate each sample

## D Additional Quantitative Results

### D.1 Details on Video-to-Audio Comparison

For the results in Table 1, we reproduce the results of Seeing and Hearing (Xing et al., 2024), V-AURA (Viertola et al., 2024), FoleyCrafter (Zhang et al., 2024), and MMAudio (Cheng et al., 2024) using the official code and pre-trained models. For the other baselines, we use the generated samples provided by the authors, i.e., Frieren, V2A-Mapper, and Movie Gen (Polyak et al., 2024). Furthermore, the CLAP<sub>cap</sub> scores of MMAudio, MovieGen, and ThinkSound are 0.43, 0.44, and 0.49, respectively.

### D.2 Impact of Model Size

We compare three model size of ThinkSound: **Large (1.3B)**, **Medium (724M)**, and **Small (533M)**. The Large model achieves the best performance across all metrics as shown in Table 3. These results demonstrate that model capacity significantly enhances audio quality and improves alignment with ground truth distribution. As model size decreases, performance degrades substantially, highlighting the necessity of adequate model capacity for effective audio generation.

Table 3: Impact of model size results.

| Size   | FD↓          | KL <sub>PaSST</sub> ↓ | KL <sub>PaNNs</sub> ↓ | DeSync↓     | CLAP <sub>CoT</sub> ↑ |
|--------|--------------|-----------------------|-----------------------|-------------|-----------------------|
| Small  | 43.26        | 1.64                  | 1.39                  | 0.50        | 0.43                  |
| Medium | 37.62        | 1.56                  | 1.34                  | 0.47        | 0.44                  |
| Large  | <b>34.56</b> | <b>1.52</b>           | <b>1.32</b>           | <b>0.46</b> | <b>0.46</b>           |

### D.3 Performance across different difficulty levels

To better validate the performance of our CoT-Guided generation, we also report the results in the video-to-audio generation of different difficulty levels. We illustrate the construction of different difficulty levels in Section A A.3. The results are shown in Table 4, and we can conclude that (1) As expected, the performance of all models decreases as the difficulty level increases, and (2) Our CoT-Guided generation outperforms other baselines across all difficulty levels.

Table 4: Performance across different difficulty levels.

| Difficulty | FD↓          | KL <sub>PaSST</sub> ↓ | KL <sub>PaNNs</sub> ↓ | DeSync↓     | CLAP <sub>CoT</sub> ↑ |
|------------|--------------|-----------------------|-----------------------|-------------|-----------------------|
| Easy       | <b>31.32</b> | <b>1.35</b>           | <b>1.16</b>           | <b>0.42</b> | <b>0.52</b>           |
| Medium     | 35.45        | 1.46                  | 1.31                  | 0.46        | 0.49                  |
| Hard       | 48.78        | 1.63                  | 1.40                  | 0.57        | 0.41                  |

#### D.4 Performance Comparisons between coarse-grained and fine-grained CoT

To further validate the effectiveness of our fine-grained CoT, we compare the performance of our model with the coarse-grained CoT. The results are shown in Table 5. We can conclude that our fine-grained CoT outperforms the coarse-grained CoT across all metrics.

Table 5: Performance comparisons between coarse-grained and fine-grained CoT.

| Granularity | FD↓          | KL <sub>PaSST</sub> ↓ | KL <sub>PaNNs</sub> ↓ | DeSync↓     | CLAP <sub>CoT</sub> ↑ |
|-------------|--------------|-----------------------|-----------------------|-------------|-----------------------|
| Coarse      | 42.72        | 1.58                  | 1.41                  | 0.52        | 0.34                  |
| Fine        | <b>34.56</b> | <b>1.52</b>           | <b>1.32</b>           | <b>0.46</b> | <b>0.46</b>           |

## E Limitation and Future

While the current MLLMs are capable of a strong understanding and reasoning of semantic information, they still have limitations in understanding the precise temporal and spatial information of video. For example, in the case of locating the exact timestamp of the sound event, MLLMs often fail to provide accurate results or provide wrong results. What’s more, the current open-source video-audio datasets for audio generation are limited in diversity and coverage, which may lack rare or culturally specific sound events. In the future, we will continue to explore more diverse and comprehensive datasets to improve the performance of our model. Furthermore, we will explore more effective methods to improve the temporal and spatial alignment of generated audio.

## F Potential Negative Societal Impacts

ThinkSound carries potential risks if misused. Malicious actors could exploit the system to generate fake audio for synthetic media, thereby contributing to the spread of misinformation. Moreover, if the training data underrepresents certain cultures or environments, the model may unintentionally amplify biases—for instance, by reinforcing stereotypes or misassociating sounds with particular demographic groups.

### F.1 Ethical Considerations

**The dataset used in this research is strictly for academic and non-commercial purposes.** We implemented several measures to ensure compliance with ethical standards, as follows.

- **Data Transparency and Anonymization.** We only provide ASR transcripts after rigorous text anonymization processes, visual features of video clips, our annotations, and links to the original videos, to ensure transparency regarding the data sources and their usage while maintaining anonymity.
- **Authorization.** Any personal data should be used only with express authorization, ensuring lawful and fair processing in accordance with applicable laws.

## G Safeguards

We used a diverse training dataset covering a wide range of acoustic scenes to minimize reinforcing stereotypes or incorrect associations between sounds and specific demographic groups. The model will be released in stages to better assess its impact and improve safeguards. However, once the model is openly released, we cannot control how others use it. Therefore, we provide clear usage guidelines to encourage responsible use and help mitigate potential misuse.

## References

- Chen, H., Xie, W., Vedaldi, A., and Zisserman, A. Vggsound: A large-scale audio-visual dataset. *arXiv preprint arXiv:2004.14368*, 2020.
- Chen, K., Du, X., Zhu, B., Ma, Z., Berg-Kirkpatrick, T., and Dubnov, S. Hts-at: A hierarchical token-semantic audio transformer for sound classification and detection. In *IEEE International Conference on Acoustics, Speech and Signal Processing, ICASSP*, 2022.
- Cheng, H. K., Ishii, M., Hayakawa, A., Shibuya, T., Schwing, A., and Mitsufuji, Y. Taming multi-modal joint training for high-quality video-to-audio synthesis. *arXiv preprint arXiv:2412.15322*, 2024.
- Copet, J., Kreuk, F., Gat, I., Remez, T., Kant, D., Synnaeve, G., Adi, Y., and Défossez, A. Simple and controllable music generation. *Advances in Neural Information Processing Systems*, 36, 2024.
- Cramer, A. L., Wu, H.-H., Salamon, J., and Bello, J. P. Look, listen, and learn more: Design choices for deep audio embeddings. In *ICASSP 2019-2019 IEEE International Conference on Acoustics, Speech and Signal Processing (ICASSP)*, pp. 3852–3856. IEEE, 2019.
- Evans, Z., Carr, C., Taylor, J., Hawley, S. H., and Pons, J. Fast timing-conditioned latent audio diffusion. *arXiv preprint arXiv:2402.04825*, 2024.
- Fonseca, E., Pons, J., Favory, X., Font, F., Bogdanov, D., Ferraro, A., Oramas, S., Porter, A., and Serra, X. Freesound datasets: A platform for the creation of open audio datasets. In Cunningham, S. J., Duan, Z., Hu, X., and Turnbull, D. (eds.), *Proceedings of the 18th International Society for Music Information Retrieval Conference, ISMIR 2017, Suzhou, China, October 23-27, 2017*, pp. 486–493, 2017.
- Gemmeke, J. F., Ellis, D. P., Freedman, D., Jansen, A., Lawrence, W., Moore, R. C., Plakal, M., and Ritter, M. Audio set: An ontology and human-labeled dataset for audio events. In *2017 IEEE international conference on acoustics, speech and signal processing (ICASSP)*, pp. 776–780. IEEE, 2017.
- Hershey, S., Ellis, D. P., Fonseca, E., Jansen, A., Liu, C., Moore, R. C., and Plakal, M. The benefit of temporally-strong labels in audio event classification. In *ICASSP 2021-2021 IEEE International Conference on Acoustics, Speech and Signal Processing (ICASSP)*, pp. 366–370. IEEE, 2021.
- Iashin, V., Xie, W., Rahtu, E., and Zisserman, A. Synchformer: Efficient synchronization from sparse cues. In *ICASSP 2024-2024 IEEE International Conference on Acoustics, Speech and Signal Processing (ICASSP)*, pp. 5325–5329. IEEE, 2024.
- Kilgour, K., Zuluaga, M., Roblek, D., and Sharifi, M. Fr’echet audio distance: A metric for evaluating music enhancement algorithms. *arXiv preprint arXiv:1812.08466*, 2018.
- Kim, C. D., Kim, B., Lee, H., and Kim, G. Audiocaps: Generating captions for audios in the wild. In *Proceedings of the 2019 Conference of the North American Chapter of the Association for Computational Linguistics: Human Language Technologies, Volume 1 (Long and Short Papers)*, pp. 119–132, 2019.
- Kong, Q., Cao, Y., Iqbal, T., Wang, Y., Wang, W., and Plumbley, M. D. Panns: Large-scale pretrained audio neural networks for audio pattern recognition. *IEEE/ACM Transactions on Audio, Speech, and Language Processing*, 28:2880–2894, 2020.
- Koutini, K., Schlüter, J., Eghbal-Zadeh, H., and Widmer, G. Efficient training of audio transformers with patchout. *arXiv preprint arXiv:2110.05069*, 2021.
- Polyak, A., Zohar, A., Brown, A., Tjandra, A., Sinha, A., Lee, A., Vyas, A., Shi, B., Ma, C.-Y., Chuang, C.-Y., et al. Movie gen: A cast of media foundation models. *arXiv preprint arXiv:2410.13720*, 2024.
- Viertola, I., Iashin, V., and Rahtu, E. Temporally aligned audio for video with autoregression. *arXiv preprint arXiv:2409.13689*, 2024.

- 251 Wu\*, Y., Chen\*, K., Zhang\*, T., Hui\*, Y., Berg-Kirkpatrick, T., and Dubnov, S. Large-scale  
252 contrastive language-audio pretraining with feature fusion and keyword-to-caption augmentation.  
253 In *IEEE International Conference on Acoustics, Speech and Signal Processing, ICASSP*, 2023.
- 254 Xing, Y., He, Y., Tian, Z., Wang, X., and Chen, Q. Seeing and hearing: Open-domain visual-audio  
255 generation with diffusion latent aligners. In *IEEE/CVF Conference on Computer Vision and*  
256 *Pattern Recognition, CVPR 2024, Seattle, WA, USA, June 16-22, 2024*, pp. 7151–7161. IEEE,  
257 2024. doi: 10.1109/CVPR52733.2024.00683. URL [https://doi.org/10.1109/CVPR52733.](https://doi.org/10.1109/CVPR52733.2024.00683)  
258 2024.00683.
- 259 Zhang, Y., Gu, Y., Zeng, Y., Xing, Z., Wang, Y., Wu, Z., and Chen, K. Foleyrafter: Bring silent  
260 videos to life with lifelike and synchronized sounds. *arXiv preprint arXiv:2407.01494*, 2024.
